# Supplementary material for: MetaPSICOV: combining coevolution methods for accurate prediction of contacts and long range hydrogen bonding in proteins
Source: PubMed Central journal article supplement (PMC4382908; doi:10.1093/bioinformatics/btu791), 2014-11-26

## Supplementary Table S1

### a) List of 561 PDB Chains used in the MetaPSICOV training set.

1bgfA 1bx7A 1c5eA 1dbfA 1e4mM 1e5kA 1e7lA 1eaqA 1eb6A 1f8eA 1fsgA 1g6lA 1gk8I 1gk9A 1gqvA  
1gu2A 1gveA 1gyxA 1h4gA 1hbnB 1hbnC 1hyoA 1i27A 1jcdA 1ji7A 1jniA 1k5cA 1ka1A 1kkoA 1kmtA  
1kqpA 1kv0A 1kyfA 1l9lA 1lc5A 1lniA 1lwbA 1lyvA 1m1qA 1m2dA 1m55A 1mkkA 1mn8A 1munA 1muwA  
1mxrA 1n8vA 1nkdA 1nqjA 1nuyA 1nz0A 1o2dA 1o4yA 1o7qA 1odmA 1oh4A 1ox0A 1p4cA 1pbjA 1q5yA  
1q7lA 1q7lB 1qh4A 1qtwA 1qw9A 1r29A 1r85A 1ra0A 1rkuA 1sauA 1sjwA 1svfA 1t6uA 1tt8A 1u07A  
1u7iA 1ucrA 1ucsA 1ukuA 1uz3A 1v05A 1vmfA 1vp8A 1vr7A 1vykA 1w0nA 1wlhA 1w66A 1wc2A 1wcwA  
1wluA 1wn2A 1wpnA 1wzdA 1x6iA 1x6zA 1xbiA 1xd3A 1xdnA 1xmtA 1xqoA 1xubA 1yfqA 1yiiA 1z0nA  
1zgzA 1zzkA 256bA 2aibA 2b0aA 2b3hA 2b82A 2b97A 2bcgG 2bkxA 2bmoA 2bmoB 2c0rA 2c1vA 2c2uA  
2c4bA 2c60A 2carA 2cb8A 2ccvA 2cg7A 2ckkA 2covD 2cs7A 2dkoB 2dlbA 2ehzA 2endA 2erfA 2f22A  
2fbaA 2fcjA 2fcwB 2fmaA 2fsqA 2g7sA 2gkE 2gkpA 2glzA 2gsoA 2gudA 2hlvA 2h8eA 2halA 2hbaA  
2hoxA 2hzcA 2i5vO 2iayA 2ic6A 2imsA 2ivyA 2j5yA 2j6bA 2j8bA 2jekA 2jliA 2nlvA 2nr7A 2nszA  
2nxvA 2o37A 2o90A 2odiA 2odkA 2ofzA 2olmA 2ovgA 2ovjA 2oxgA 2oxgB 2p0nA 2p2sA 2p5lA 2p8gA  
2pieA 2pneA 2q52A 2qfaB 2qfeA 2qipA 2qjzA 2qngA 2qsbA 2r0xA 2r16A 2r2zA 2r3lA 2r5oA 2r75l  
2ra9A 2rctA 2rdqA 2rfrA 2rh2A 2uvoA 2ux9A 2v89A 2v8tA 2v9vA 2ve8A 2vfrA 2vn6B 2vwsA 2w3gA  
2w5qA 2w7aA 2wbqA 2wcjA 2wdsA 2wllA 2wnpF 2wq4A 2x3mA 2x4kA 2x5yA 2xfdA 2xioA 2xjpA 2xmjA  
2xomA 2xpwA 2xw6A 2y0oA 2y39A 2y5pA 2y6hA 2y9fA 2yh5A 2ylbA 2ylnA 2z4uA 2z5wA 2zexA 2znrA  
3a02A 3a09A 3a6rA 3a9bA 3achA 3acxA 3agnA 3aiaA 3ak2A 3amrA 3ap9A 3awuA 3b79A 3bbba 3bfqG  
3bjeA 3bmzA 3bnjA 3bo6A 3boeA 3bqpA 3bwzA 3bxuA 3chbD 3chvA 3ci3A 3cija 3cimA 3cjsB 3ckmA  
3d32A 3d3bJ 3d4eA 3d9xA 3db7A 3e4gA 3e8tA 3eerA 3eo6A 3eyeA 3eyiA 3f40A 3f6vA 3f6yA 3f7eA  
3f7xA 3f9xA 3fciA 3fdeA 3feaa 3fghA 3fgvA 3fila 3g0kA 3g16A 3g21A 3g4eA 3gbwA 3giuA 3gneA  
3gveA 3gxhA 3gzrA 3h0nA 3h4tA 3h4xA 3h87A 3h87C 3hfoA 3hhtB 3hlxA 3hnxA 3hwuA 3hx8A 3hynA  
3i4oA 3i6cA 3i7mA 3i94A 3ib5A 3ie4A 3iism 3imkA 3ip0A 3isxA 3itfA 3ivvA 3ix3A 3jumA 3k5jA  
3k67A 3k7iB 3ka8A 3kuuA 3kwrA 3lleA 3l41A 3l46A 3l8wA 3ldcA 3ledA 3lftA 3lydA 3lzqA 3m0mA  
3m3pA 3m5qA 3m7aA 3m9qA 3mabA 3maoA 3mmhA 3mqzA 3mwxA 3myxA 3n0lA 3n4jA 3njnA 3no2A 3ns6A  
3nvsA 3nwpA 3nytA 3nzlA 3olnA 3o8mA 3oajA 3oblA 3od9A 3oruA 3ov5A 3oyvA 3p4hA 3pd7A 3pesA  
3pfzA 3piwA 3pkvA 3pmcA 3pojA 3pplA 3q39A 3q3yA 3qc0A 3qdsA 3qhbA 3ql9A 3qooA 3qu3A 3r5tA  
3rkqA 3robA 3rpcA 3rq9A 3rwnA 3slyA 3s8sA 3s9xA 3seeA 3sk2A 3so6A 3sojA 3sovA 3su6A 3sukA  
3sylA 3t2cA 3t47A 3t49A 3t94A 3tm8A 3tnlA 3tvjA 3tysA 3u6gA 3u7qA 3u7zA 3u97A 3ub6A 3uciA  
3uejA 3uhmA 3ur8A 3uxjA 3v39A 3v4kA 3vorA 3vqjA 3vrcA 3vubA 3vypA 3vz9B 3w5hA 3wg3A 3wkgA  
3zfpA 3zhnA 3zk9A 3zn4A 3znvA 3zpyA 3zudA 3zZoA 3zzpA 4a02A 4a56A 4a8uA 4acjA 4afmA 4a10A  
4annA 4attA 4aulA 4avsA 4blmA 4b62A 4b9pA 4bfoA 4bgbA 4boqA 4bpsA 4brcA 4bt7A 4c45A 4cayB  
4co8A 4d8bA 4di9A 4dqjA 4driB 4dt5A 4dwrA 4ebgA 4eguA 4emnA 4enfA 4ep4A 4espA 4euaA 4exkA  
4f3jA 4f87A 4f8zA 4f98A 4fchA 4fglA 4fioA 4fkba 4ftfA 4fz1A 4fzPA 4g0xA 4g9sB 4gaiA 4gbuA  
4ggcA 4gmqA 4gofA 4gq4A 4gucA 4gxwA 4h4dA 4h4nA 4h6cA 4h7wA 4h8eA 4hddA 4he6A 4hi8B 4hlsA  
4ht2A 4ht3B 4htgA 4hwvA 4i6yA 4ibyA 4ieua 4iilA 4il7A 4ippA 4ipuA 4iqbA 4ivvA 4ix3A 4jb7A  
4jf8A 4jg2A 4jglA 4jguA 4jhtA 4jiuA 4jmlA 4jp6A 4jtmA 4jxhA 4kdwA 4kn9S 4kt3B 4l2hA 4l2iA  
4l6dA 4l9pB 4ld1A 4lerA 4lhsA 4ljhA 4lpqA 4lta 4lupA 4mlvA 4m5rA 4mjdA 4muqA 4n2pA 4n4bA  
4n6pA 4nbpA 4nkpA 4nzka 4o0aA 4or1A0

### b) List of 63 PDB Chains used for validation during early-stopped training.

1atgA 1f86A 1h12A 1k5nA 1lq9A 1mwqA 1oaiA 1qqfA 1t2dA 1vlyA 1wdpA 1xmkA 2aebA 2bt9A 2ciwA  
2fb6A 2gqtA 2ia7A 2lisA 2oizA 2p8iA 2qvka 2rffA 2vlaA 2wlvA 2xolA 2yhgA 3a72A 3b5mA 3buuA  
3clmA 3exvA 3fcnA 3g9lA 3h5jA 3hzpA 3ipjA 3ke7A 3lhnA 3mjfA 3nufA 3oheA 3plwA 3qnsA 3s44A  
3sw0A 3u2uA 3uueA 3vz9D 3zrxA 4alzA 4bn4A 4do4A 4esmA 4fh0A 4gc3A 4h6qA 4hwmA 4iumA 4jk8A  
4l2iB 4m0kA 4nyqA

## Supplementary Table S2

List of 434 protein chains with effective sequence counts used to benchmark MetaPSICOV on smaller sequence families.

|           |           |           |           |           |
|-----------|-----------|-----------|-----------|-----------|
| 3WU2D 3   | 3WU2E 7   | 1EERA 8   | 3Q7CA 8   | 2OIZD 9   |
| 4FMHA 9   | 2FHZB 10  | 1EEXB 10  | 4EGDA 10  | 1RZHM 10  |
| 1G73A 11  | 2INWA 12  | 3REAA 13  | 10O0A 13  | 3WU2H 13  |
| 4DEYB 14  | 2JCQA 14  | 1KQRA 14  | 2P58B 14  | 3TUOA 14  |
| 4K12B 14  | 4L5RC 15  | 2HNQA 15  | 4J9YB 15  | 1IUQA 16  |
| 2GIBA 16  | 3TEQA 17  | 3UMHA 17  | 3KU3A 17  | 4BK0A 17  |
| 3U28B 18  | 3RNV A 18 | 1K8KF 18  | 1NKZA 18  | 1K04A 19  |
| 3LQ9A 19  | 3WU2O 20  | 4G92A 20  | 1N13A 20  | 2GRRB 20  |
| 2QZQA 20  | 1EEXG 20  | 3JSRA 20  | 3MSWA 20  | 2BO9B 20  |
| 411FA 21  | 1GVPA 21  | 3OFGA 21  | 3GP6A 21  | 1LMIA 22  |
| 4EW5A 22  | 3N6YA 22  | 4IX7A 22  | 3GQHA 22  | 2J9UB 23  |
| 3MXNB 23  | 3LT7A 23  | 4KOOA 23  | 3HMSA 24  | 2XGRA 24  |
| 3N8BA 24  | 4JPRA 24  | 1Q8DA 24  | 4BVQA 24  | 3OSTA 24  |
| 3THGA 25  | 2P14A 25  | 4I4TE 25  | 1W2YA 26  | 4K2PA 26  |
| 3WU2Z 26  | 1T61A 27  | 3UZQB 27  | 3C2QA 27  | 2PU9A 27  |
| 1C1YB 27  | 4KA9A 27  | 1FTRA 27  | 1BEAA 28  | 1Y96B 28  |
| 2QV6A 28  | 3T92A 28  | 2GUKA 29  | 2YGNA 29  | 2XUVA 29  |
| 2XOCA 29  | 1RZHH 30  | 3MXNA 30  | 3A8GA 30  | 4E6FA 30  |
| 1LKIA 30  | 3F4MA 30  | 4I9OA 31  | 2BBAA 32  | 4ATHA 32  |
| 4B2FA 32  | 1XKPA 32  | 2JDII 33  | 4JQUB 33  | 2Z3QA 33  |
| 3MCBB 33  | 4LDVA 33  | 3VOQA 34  | 3HWPA 34  | 3AQEA 34  |
| 4GIPA 35  | 2FKKA 35  | 4KMYA 36  | 1F3UB 36  | 3EA6A 36  |
| 2D1LA 36  | 4COZA 37  | 1MNN A 37 | 1K4NA 37  | 1XCRA 38  |
| 2HU9A 38  | 3IM6A 38  | 2P3PA 38  | 3TS9A 38  | 2J6GA 38  |
| 2NMLA 38  | 2Q9RA 38  | 4C2WC 39  | 3NRHA 39  | 3SC0A 39  |
| 1J98A 39  | 2OVSA 39  | 2GA1A 39  | 4HWCA 39  | 3HIEA 39  |
| 1BGCA 40  | 1EG3A 40  | 4CRUB 40  | 4KPIA 40  | 1R0DA 40  |
| 3C18A 40  | 4KQ7A 40  | 3A2ZA 40  | 4AQRD 41  | 2IA1A 41  |
| 2VSMB 41  | 2AP3A 41  | 3NJCA 42  | 3PS0A 42  | 2V6XB 42  |
| 1K8KE 42  | 3GE3E 42  | 3OBHA 43  | 1D8HA 43  | 2IM8A 43  |
| 4GIWA 43  | 3MMYB 43  | 3Q20A 43  | 1WPBA 44  | 3A77A 44  |
| 2PSPA 44  | 3USHA 44  | 1G8EA 44  | 3VP9A 45  | 1ROCA 45  |
| 4BQNA 45  | 2W56A 45  | 4KRDB 45  | 4H3KB 46  | 3DZAA 47  |
| 3CX5G 47  | 4ADNA 47  | 4BBOA 47  | 2I74A 47  | 3RF3A 47  |
| 4A6QA 48  | 2Y1BA 48  | 2F01A 48  | 1F00I 49  | 1MTYB 49  |
| 2J43A 49  | 4JHQA 50  | 2PU3A 50  | 2R4GA 51  | 4A2VA 51  |
| 3UV1A 51  | 1W53A 52  | 3HN5A 52  | 2QHQA 53  | 3TOWA 53  |
| 2YK4A 53  | 2REUA 53  | 2F5TX 54  | 4J8SA 54  | 3VHJA 55  |
| 3C9QA 55  | 3VZHA 55  | 3CBNA 55  | 3AG3H 56  | 2HUHA 56  |
| 3QYFA 56  | 3CX5F 56  | 4CCVA 56  | 4J32A 57  | 1I7WB 57  |
| 1YQEA 57  | 2BBRA 58  | 3NPHB 58  | 1NH2D 58  | 2XXPA 59  |
| 3AG3G 59  | 2P2VA 59  | 3D34A 59  | 3DGPB 61  | 1UPKA 61  |
| 2YV9A 62  | 3VBCA 63  | 2O62A 63  | 3NCEA 64  | 4GOQA 65  |
| 3NR5A 65  | 3SXUB 65  | 3U4GA 66  | 3CX5I 66  | 1IG0A 66  |
| 3V46A 67  | 2Y7LA 68  | 4H0AA 68  | 2X55A 68  | 3D33A 68  |
| 3Q3MB 69  | 2J6AA 70  | 4B89A 70  | 3LKMA 70  | 3F5RA 70  |
| 3GD0A 70  | 2D68A 70  | 1PX5A 70  | 1KZQA 70  | 1POCA 71  |
| 3NRXA 71  | 3RLSA 71  | 3BPJA 71  | 3W1EA 71  | 2Y3VA 72  |
| 4DDPA 72  | 1F3UA 72  | 1KCMA 72  | 2OKMA 73  | 3ZQQA 74  |
| 2SICI 74  | 2V7KA 74  | 4GIOA 74  | 2F4MB 75  | 1OEYA 76  |
| 2Q03A 77  | 4LKMA 78  | 4GDZA 78  | 4IOYX 78  | 4ATGA 78  |
| 3WP9A 79  | 1DZFA 79  | 4KJMA 79  | 2HJNA 79  | 2H1TA 79  |
| 3VGIA 79  | 3WX1A 80  | 4LUNU 80  | 2XPPA 81  | 3UD1A 81  |
| 1U7LA 82  | 2OEBA 82  | 3O2TA 82  | 3GKJA 82  | 2ERVA 83  |
| 3O6CA 83  | 4K98A 84  | 1ZD0A 84  | 3FHVA 84  | 1XODA 84  |
| 3CHHA 84  | 3MHSB 84  | 3HFTA 85  | 1WV3A 85  | 2OKFA 85  |
| 3U1CA 86  | 2ES4D 86  | 3C5NA 86  | 4AT7B 87  | 2P4FA 87  |
| 2VLQA 87  | 4LIMA 87  | 3LGBA 88  | 4E29A 88  | 2I9XA 89  |
| 2E7VA 91  | 2V94A 92  | 3QZMA 93  | 3NNBA 93  | 3BUTA 94  |
| 1SDIA 94  | 2IT2A 94  | 4L9HA 94  | 2WJRA 94  | 3H8TA 94  |
| 3D7AA 94  | 4FGQA 95  | 1R9WA 95  | 3DXTA 96  | 4BJIA 97  |
| 2ZX2A 97  | 3POWA 97  | 3PLOA 98  | 4G6TA 98  | 3FGRB 99  |
| 2QUPA 99  | 1JHSA 99  | 2P26A 100 | 4HZDA 100 | 1UTGA 100 |
| 2WNKA 100 | 3POYA 100 | 3PR6A 101 | 3KMIA 101 | 3GNZP 101 |
| 4BWCA 104 | 3KDFA 104 | 3QF2A 105 | 4FQEA 105 | 3BHWA 105 |
| 3SBTB 109 | 2WVQA 109 | 2IMHA 109 | 3GAEA 109 | 2NZ7A 110 |
| 1TS9A 110 | 1JIDA 110 | 4JMDA 111 | 2FCOA 111 | 4CDPA 111 |
| 3ONJA 112 | 2GAKA 113 | 2NW8A 114 | 4HRVA 114 | 3WJCA 114 |
| 3LTIA 114 | 2XDJA 115 | 1JYOA 116 | 3T7HA 116 | 4E1SA 116 |
| 1MFWA 117 | 3QR7A 118 | 4IHZA 118 | 2CAYA 119 | 3TC2A 120 |
| 3FIDA 120 | 4DLHA 120 | 3HRGA 121 | 2F9HA 123 | 2O2KA 124 |

|       |     |       |     |       |     |       |     |       |     |
|-------|-----|-------|-----|-------|-----|-------|-----|-------|-----|
| 2V0PA | 125 | 1F46A | 126 | 3ZY2A | 129 | 1RYLA | 129 | 2FSUA | 130 |
| 3UWSB | 131 | 2I9WA | 132 | 2BKYA | 133 | 2BL0A | 133 | 1NLQA | 135 |
| 3G36A | 136 | 2PW0A | 137 | 2WZOA | 137 | 2WNFA | 138 | 4J7NA | 139 |
| 3EVYA | 140 | 3KEVA | 140 | 4L0JA | 141 | 2Y4YA | 141 | 2PNWA | 141 |
| 3QF7C | 141 | 4I8IA | 143 | 4CV4A | 143 | 2A9IA | 144 | 3JV1A | 144 |
| 3ABDA | 145 | 2ZYZB | 146 | 4KK7A | 146 | 4GJ4A | 148 | 2ZOUA | 149 |
| 3G3TA | 150 | 3AKJA | 150 | 2OX7A | 151 | 4DQ9A | 152 | 3V3LA | 152 |
| 3FO5A | 154 | 2J73A | 155 | 1YLLA | 160 | 1ZHVA | 162 | 3OE3A | 163 |
| 4LW9A | 166 | 4I90A | 169 | 2CWYA | 170 | 4M8ZA | 170 | 2Z14A | 172 |
| 3CHMA | 172 | 2G5GX | 174 | 2PH0A | 174 | 2ZCAA | 176 | 1VBWA | 178 |
| 4FQGA | 178 | 3ZHFA | 180 | 4FMWA | 181 | 1OCYA | 183 | 3ZLCA | 192 |
| 2Y8YA | 193 | 3TE8A | 195 | 3N6ZA | 196 | 1IZMA | 200 | 1IWMA | 200 |
| 3QDHA | 205 | 2Z0JA | 206 | 2X9ZA | 207 | 1PV5A | 208 | 3TUTA | 211 |
| 4B60A | 211 | 2AJ7A | 226 | 1T9IA | 231 | 2OQZA | 241 | 1U0SA | 246 |
| 1R0UA | 246 | 3TIPA | 259 | 2I5IA | 263 | 4JJ2A | 268 | 2X46A | 276 |
| 2IDLA | 293 | 2YMVA | 294 | 2V05A | 305 | 4K4KA | 330 |       |     |

## Supplementary Table S3

Summary of input features used by MetaPSICOV.

|                                                                                                                                                                                                                         | size | number of features |
|-------------------------------------------------------------------------------------------------------------------------------------------------------------------------------------------------------------------------|------|--------------------|
| <b>STAGE 1</b>                                                                                                                                                                                                          |      | <b>672</b>         |
| <b>WINDOWS</b>                                                                                                                                                                                                          |      |                    |
| two 9-residue windows at residues i,j                                                                                                                                                                                   | 18   | -                  |
| 5-residue window at midpoint between i,j                                                                                                                                                                                | 5    | -                  |
| <b>COLUMN FEATURES</b>                                                                                                                                                                                                  |      |                    |
| amino acid composition                                                                                                                                                                                                  | 21   | 483                |
| probability of a helix, strand and coil (PSIPRED)                                                                                                                                                                       | 3    | 69                 |
| predicted solvent accessibility (SOLVPRED)                                                                                                                                                                              | 1    | 23                 |
| Shannon entropy of the alignment column                                                                                                                                                                                 | 1    | 23                 |
| missing data (e.g. if window exceeds the limits of the sequence)                                                                                                                                                        | 1    | 23                 |
| <b>COEVOLUTION FEATURES</b>                                                                                                                                                                                             |      |                    |
| mutual information                                                                                                                                                                                                      |      | 1                  |
| normalised mutual information (Dunn et al., 2008)                                                                                                                                                                       |      | 1                  |
| mean contact potential                                                                                                                                                                                                  |      | 1                  |
| PSICOV score                                                                                                                                                                                                            |      | 1                  |
| mfDCA score                                                                                                                                                                                                             |      | 1                  |
| CCMpred score                                                                                                                                                                                                           |      | 1                  |
| sequence separation ( $ i-j  < 5$ ; $ i-j  = \{5, 6, \dots, 13\}$ ; $14 \leq  i-j  \leq 17$ ; $18 \leq  i-j  \leq 22$ ; $23 \leq  i-j  \leq 27$ ; $28 \leq  i-j  \leq 37$ ; $38 \leq  i-j  \leq 47$ ; $ i-j  \geq 48$ ) |      | 16                 |
| <b>GLOBAL SEQUENCE FEATURES</b>                                                                                                                                                                                         |      |                    |
| global amino acid composition (incl. gap)                                                                                                                                                                               |      | 21                 |
| global fractions of predicted secondary structures                                                                                                                                                                      |      | 3                  |
| global average predicted solvent exposure                                                                                                                                                                               |      | 1                  |
| log sequence length                                                                                                                                                                                                     |      | 1                  |
| log number of sequences in the alignment                                                                                                                                                                                |      | 1                  |
| log effective number of sequences                                                                                                                                                                                       |      | 1                  |
| global average Shannon entropy                                                                                                                                                                                          |      | 1                  |
| <b>STAGE 2</b>                                                                                                                                                                                                          |      | <b>731</b>         |
| <b>WINDOWS</b>                                                                                                                                                                                                          |      |                    |
| two 11-residue windows at residues i,j                                                                                                                                                                                  | 22   | -                  |
| <b>FEATURES</b>                                                                                                                                                                                                         |      |                    |
| column features (as in Stage 1)                                                                                                                                                                                         | 27   | 594                |
| sequence separation (as in Stage 1)                                                                                                                                                                                     |      | 16                 |
| 11x11 matrix of Stage 1 outputs                                                                                                                                                                                         |      | 121                |

### Supplementary Table S4

Mean precision values for the top-L, top-L/2, top-L/5 and top-L/1 contacts, L= length of target protein, at different sequence separation ranges  $i-j \geq 5$  and  $i-j \geq 23$ , where the C $\beta$ -C $\beta$  distance < 8 Å. Each row corresponds to the first stage results from a different combination of the three coevolution methods, with all other neural network features included.

|                    | [i-j] $\geq$ 5 |      |      |      | [i-j] $\geq$ 23 |      |      |      |
|--------------------|----------------|------|------|------|-----------------|------|------|------|
|                    | L              | L/2  | L/5  | L/10 | L               | L/2  | L/5  | L/10 |
| PSICOV             | 0.39           | 0.43 | 0.55 | 0.7  | 0.29            | 0.37 | 0.45 | 0.52 |
| DCA                | 0.45           | 0.5  | 0.67 | 0.81 | 0.36            | 0.47 | 0.6  | 0.68 |
| PSICOV+DCA         | 0.49           | 0.57 | 0.76 | 0.87 | 0.41            | 0.54 | 0.7  | 0.78 |
| CCMpred            | 0.6            | 0.75 | 0.88 | 0.94 | 0.44            | 0.59 | 0.75 | 0.82 |
| PSICOV+CCMpred     | 0.63           | 0.78 | 0.89 | 0.95 | 0.46            | 0.61 | 0.77 | 0.84 |
| DCA+CCMpred        | 0.65           | 0.79 | 0.9  | 0.95 | 0.47            | 0.62 | 0.77 | 0.84 |
| PSICOV+DCA+CCMpred | 0.66           | 0.79 | 0.9  | 0.95 | 0.47            | 0.63 | 0.78 | 0.85 |

## Supplementary Table S5

Results for structure-based cross-validation of MetaPSICOV benchmark results. a) The subset of 101 proteins used to check cross-validation results. Any protein sharing a common domain superfamily according to CATH release 4.0 was excluded from the original set of 150 proteins. b) Superfamily filtered benchmark results for residue separation  $[i-j] \geq 5$ . c) Results for  $[i-j] \geq 23$ . In each case the mean precision is given, along with the sample standard deviation and calculated t-test p-value.

a)

1a3aA 1a6mA 1a70A 1aapA 1aoeA 1atzA 1avsA 1bdoA 1behA 1brfA  
 1c44A 1chdA 1ckeA 1ctfA 1cxyA 1d0qA 1d4oA 1dbxA 1dixA 1dlwA  
 1dmgA 1ej0A 1ej8A 1ek0A 1f6bA 1fcyA 1fk5A 1fvga 1fx2A 1g2rA  
 1g9oA 1gbsA 1gmiA 1gmxA 1gz2A 1h0pA 1h2eA 1h4xA 1h98A 1hh8A  
 1htwA 1hxnA 1i1jA 1i1nA 1i4jA 1i58A 1i71A 1ihzA 1im5A 1j3aA  
 1jbkA 1jkxA 1jo0A 1jo8A 1jwqA 1jyhA 1k6kA 1k7cA 1k7jA 1kidA  
 1kq6A 1ktgA 1lm4A 1lpyA 1m4jA 1m8aA 1mk0A 1nb9A 1ne2A 1npsA  
 1nrvA 1ny1A 1olzA 1p90A 1pchA 1qf9A 1qjpA 1ql0A 1roaA 1rw7A  
 1rybA 1svyA 1t8kA 1tifA 1tqgA 1tzvA 1vfyA 1vhuA 1vjka 1vmbA  
 1whiA 1wjxA 1wkcA 1xdzA 1xffA 1xkrA 2arcA 2hs1A 2mhrA 3borA  
 3dqqA

b)

|          | N   | L         |        |      | L/2       |        |      | L/5       |        |      | L/10      |        |      |
|----------|-----|-----------|--------|------|-----------|--------|------|-----------|--------|------|-----------|--------|------|
|          |     | Precision | StdDev | p    | Precision | StdDev | p    | Precision | StdDev | p    | Precision | StdDev | p    |
| All      | 150 | 0.71      | 0.114  | 0.49 | 0.83      | 0.099  | 0.43 | 0.91      | 0.086  | 1.00 | 0.94      | 0.078  | 0.30 |
| No Sfams | 101 | 0.68      | 0.114  |      | 0.8       | 0.1    |      | 0.91      | 0.083  |      | 0.95      | 0.074  |      |

c)

|          | N   | L         |        |      | L/2       |        |      | L/5       |        |      | L/10      |        |      |
|----------|-----|-----------|--------|------|-----------|--------|------|-----------|--------|------|-----------|--------|------|
|          |     | Precision | StdDev | p    | Precision | StdDev | p    | Precision | StdDev | p    | Precision | StdDev | p    |
| All      | 150 | 0.54      | 0.167  | 0.63 | 0.69      | 0.185  | 1.00 | 0.83      | 0.177  | 1.00 | 0.88      | 0.169  | 1.00 |
| No Sfams | 101 | 0.53      | 0.156  |      | 0.69      | 0.173  |      | 0.83      | 0.164  |      | 0.88      | 0.153  |      |

## Supplementary Table S6

TM scores for representative models extracted from FRAGFOLD ensembles for each of the 150 benchmark protein chains.

| PDB Code & Chain | No contacts | PSICOV contacts | MP Stage1 contacts | MP Stage2 contacts |
|------------------|-------------|-----------------|--------------------|--------------------|
| 1a3aA            | 0.286       | 0.422           | 0.549              | 0.566              |
| 1a6mA            | 0.332       | 0.391           | 0.494              | 0.571              |
| 1a70A            | 0.279       | 0.353           | 0.400              | 0.424              |
| 1aapA            | 0.273       | 0.408           | 0.280              | 0.359              |
| 1abaA            | 0.278       | 0.477           | 0.527              | 0.599              |
| 1ag6A            | 0.224       | 0.351           | 0.460              | 0.453              |
| 1aoeA            | 0.176       | 0.305           | 0.244              | 0.334              |
| 1atlA            | 0.336       | 0.263           | 0.297              | 0.329              |
| 1atzA            | 0.293       | 0.578           | 0.381              | 0.404              |
| 1avsA            | 0.615       | 0.417           | 0.435              | 0.561              |
| 1bdoA            | 0.170       | 0.306           | 0.258              | 0.293              |
| 1bebA            | 0.424       | 0.248           | 0.440              | 0.506              |
| 1behA            | 0.191       | 0.236           | 0.278              | 0.249              |
| 1bkrA            | 0.314       | 0.415           | 0.534              | 0.578              |
| 1brfA            | 0.204       | 0.237           | 0.378              | 0.355              |
| 1bsgA            | 0.184       | 0.358           | 0.321              | 0.313              |
| 1c44A            | 0.265       | 0.241           | 0.456              | 0.434              |
| 1c52A            | 0.338       | 0.271           | 0.497              | 0.327              |
| 1c9oA            | 0.438       | 0.582           | 0.641              | 0.595              |
| 1cc8A            | 0.555       | 0.687           | 0.819              | 0.720              |
| 1chdA            | 0.225       | 0.530           | 0.581              | 0.525              |
| 1cjuA            | 0.242       | 0.394           | 0.572              | 0.502              |
| 1ckeA            | 0.247       | 0.394           | 0.402              | 0.400              |
| 1ctfA            | 0.402       | 0.561           | 0.509              | 0.636              |
| 1cxyA            | 0.278       | 0.463           | 0.451              | 0.473              |
| 1cznA            | 0.254       | 0.436           | 0.496              | 0.448              |
| 1d0qA            | 0.240       | 0.437           | 0.497              | 0.415              |
| 1d1qA            | 0.233       | 0.374           | 0.453              | 0.340              |
| 1d4oA            | 0.263       | 0.311           | 0.205              | 0.302              |
| 1dbxA            | 0.229       | 0.275           | 0.482              | 0.278              |
| 1dixA            | 0.291       | 0.204           | 0.260              | 0.304              |
| 1dlwA            | 0.588       | 0.614           | 0.519              | 0.625              |
| 1dmgA            | 0.225       | 0.285           | 0.316              | 0.336              |
| 1dggA            | 0.186       | 0.206           | 0.243              | 0.251              |
| 1dsxA            | 0.269       | 0.353           | 0.437              | 0.379              |
| 1eazA            | 0.382       | 0.394           | 0.589              | 0.623              |
| 1ej0A            | 0.274       | 0.394           | 0.556              | 0.605              |
| 1ej8A            | 0.269       | 0.206           | 0.341              | 0.278              |
| 1ek0A            | 0.234       | 0.541           | 0.552              | 0.455              |
| 1f6bA            | 0.288       | 0.395           | 0.473              | 0.405              |
| 1fcyA            | 0.302       | 0.438           | 0.256              | 0.350              |
| 1fk5A            | 0.375       | 0.441           | 0.502              | 0.446              |
| 1fl0A            | 0.253       | 0.229           | 0.313              | 0.370              |
| 1fnaA            | 0.719       | 0.687           | 0.757              | 0.744              |
| 1fmtA            | 0.309       | 0.524           | 0.488              | 0.515              |
| 1fvqA            | 0.229       | 0.391           | 0.501              | 0.400              |
| 1fvkA            | 0.213       | 0.585           | 0.559              | 0.441              |
| 1fx2A            | 0.255       | 0.559           | 0.501              | 0.508              |
| 1g2rA            | 0.387       | 0.515           | 0.423              | 0.454              |
| 1g9oA            | 0.369       | 0.565           | 0.677              | 0.474              |
| 1gbsA            | 0.223       | 0.321           | 0.492              | 0.497              |
| 1gmiA            | 0.177       | 0.254           | 0.330              | 0.404              |
| 1gmxA            | 0.375       | 0.583           | 0.631              | 0.604              |
| 1guuA            | 0.405       | 0.645           | 0.510              | 0.522              |
| 1gz2A            | 0.246       | 0.303           | 0.278              | 0.287              |
| 1gzcA            | 0.211       | 0.200           | 0.298              | 0.263              |
| 1h0pA            | 0.213       | 0.264           | 0.287              | 0.252              |
| 1h2eA            | 0.227       | 0.436           | 0.465              | 0.410              |

| PDB Code & Chain | No contacts | PSICOV contacts | MP Stage1 contacts | MP Stage2 contacts |
|------------------|-------------|-----------------|--------------------|--------------------|
| 1h4xA            | 0.340       | 0.559           | 0.653              | 0.733              |
| 1h98A            | 0.227       | 0.284           | 0.325              | 0.367              |
| 1hdoA            | 0.210       | 0.572           | 0.624              | 0.655              |
| 1hfcA            | 0.250       | 0.312           | 0.246              | 0.346              |
| 1hh8A            | 0.282       | 0.496           | 0.448              | 0.394              |
| 1htwA            | 0.272       | 0.511           | 0.671              | 0.583              |
| 1hxnA            | 0.261       | 0.189           | 0.261              | 0.297              |
| 1i1jA            | 0.220       | 0.178           | 0.261              | 0.353              |
| 1i1nA            | 0.322       | 0.538           | 0.438              | 0.467              |
| 1i4jA            | 0.358       | 0.413           | 0.621              | 0.487              |
| 1i58A            | 0.224       | 0.399           | 0.435              | 0.460              |
| 1i5gA            | 0.401       | 0.475           | 0.541              | 0.573              |
| 1i71A            | 0.246       | 0.257           | 0.184              | 0.322              |
| 1ihzA            | 0.291       | 0.535           | 0.493              | 0.441              |
| 1iibA            | 0.606       | 0.567           | 0.639              | 0.622              |
| 1im5A            | 0.278       | 0.506           | 0.530              | 0.464              |
| 1iwdA            | 0.213       | 0.438           | 0.470              | 0.398              |
| 1j3aA            | 0.287       | 0.345           | 0.504              | 0.460              |
| 1jbeA            | 0.639       | 0.811           | 0.798              | 0.811              |
| 1jbkA            | 0.219       | 0.222           | 0.293              | 0.250              |
| 1jfuA            | 0.294       | 0.416           | 0.578              | 0.464              |
| 1jfxA            | 0.211       | 0.534           | 0.585              | 0.548              |
| 1jkxA            | 0.305       | 0.413           | 0.578              | 0.461              |
| 1jl1A            | 0.278       | 0.408           | 0.385              | 0.414              |
| 1jo0A            | 0.421       | 0.562           | 0.612              | 0.486              |
| 1jo8A            | 0.814       | 0.796           | 0.839              | 0.799              |
| 1josA            | 0.295       | 0.426           | 0.632              | 0.611              |
| 1jvwA            | 0.206       | 0.332           | 0.400              | 0.428              |
| 1jwqA            | 0.292       | 0.486           | 0.459              | 0.528              |
| 1jyhA            | 0.233       | 0.292           | 0.369              | 0.294              |
| 1k6kA            | 0.280       | 0.531           | 0.604              | 0.605              |
| 1k7cA            | 0.200       | 0.448           | 0.402              | 0.419              |
| 1k7jA            | 0.185       | 0.286           | 0.260              | 0.307              |
| 1kidA            | 0.265       | 0.417           | 0.377              | 0.299              |
| 1kq6A            | 0.281       | 0.377           | 0.516              | 0.400              |
| 1kqrA            | 0.205       | 0.186           | 0.190              | 0.232              |
| 1ktgA            | 0.270       | 0.304           | 0.360              | 0.250              |
| 1ku3A            | 0.514       | 0.607           | 0.546              | 0.469              |
| 1kw4A            | 0.538       | 0.505           | 0.652              | 0.645              |
| 1lm4A            | 0.203       | 0.368           | 0.407              | 0.259              |
| 1lo7A            | 0.229       | 0.458           | 0.570              | 0.498              |
| 1lpyA            | 0.224       | 0.483           | 0.368              | 0.297              |
| 1m4jA            | 0.260       | 0.251           | 0.502              | 0.338              |
| 1m8aA            | 0.432       | 0.475           | 0.305              | 0.491              |
| 1mk0A            | 0.301       | 0.266           | 0.315              | 0.373              |
| 1mugA            | 0.286       | 0.310           | 0.301              | 0.303              |
| 1nb9A            | 0.214       | 0.359           | 0.408              | 0.335              |
| 1ne2A            | 0.309       | 0.392           | 0.536              | 0.401              |
| 1npsA            | 0.291       | 0.362           | 0.330              | 0.366              |
| 1nrvA            | 0.467       | 0.550           | 0.461              | 0.580              |
| 1ny1A            | 0.236       | 0.314           | 0.437              | 0.379              |
| 1o1zA            | 0.383       | 0.498           | 0.597              | 0.597              |
| 1p90A            | 0.264       | 0.269           | 0.498              | 0.435              |
| 1pchA            | 0.303       | 0.504           | 0.617              | 0.663              |
| 1pkoA            | 0.267       | 0.322           | 0.349              | 0.295              |
| 1qf9A            | 0.263       | 0.447           | 0.385              | 0.415              |
| 1qjpA            | 0.189       | 0.276           | 0.279              | 0.282              |
| 1ql0A            | 0.194       | 0.243           | 0.306              | 0.288              |
| 1r26A            | 0.474       | 0.687           | 0.698              | 0.634              |
| 1roaA            | 0.395       | 0.425           | 0.453              | 0.418              |
| 1rw1A            | 0.292       | 0.419           | 0.578              | 0.448              |
| 1rw7A            | 0.206       | 0.355           | 0.461              | 0.442              |
| 1rybA            | 0.290       | 0.369           | 0.369              | 0.262              |
| 1smxA            | 0.316       | 0.395           | 0.375              | 0.375              |
| 1svyA            | 0.426       | 0.527           | 0.524              | 0.599              |
| 1t8kA            | 0.441       | 0.675           | 0.728              | 0.673              |
| 1tifA            | 0.325       | 0.480           | 0.541              | 0.416              |



| <b>PDB Code &amp; Chain</b> | <b>No contacts</b> | <b>PSICOV contacts</b> | <b>MP Stage1 contacts</b> | <b>MP Stage2 contacts</b> |
|-----------------------------|--------------------|------------------------|---------------------------|---------------------------|
| 1tqgA                       | 0.389              | 0.663                  | 0.738                     | 0.822                     |
| 1tqhA                       | 0.207              | 0.358                  | 0.471                     | 0.531                     |
| 1tzvA                       | 0.314              | 0.693                  | 0.739                     | 0.731                     |
| 1vfyA                       | 0.284              | 0.218                  | 0.358                     | 0.287                     |
| 1vhuA                       | 0.412              | 0.589                  | 0.653                     | 0.628                     |
| 1vjkA                       | 0.338              | 0.510                  | 0.524                     | 0.502                     |
| 1vmbA                       | 0.263              | 0.439                  | 0.524                     | 0.290                     |
| 1vp6A                       | 0.295              | 0.251                  | 0.470                     | 0.385                     |
| 1w0hA                       | 0.211              | 0.334                  | 0.405                     | 0.581                     |
| 1whiA                       | 0.241              | 0.335                  | 0.373                     | 0.359                     |
| 1wjxA                       | 0.208              | 0.269                  | 0.371                     | 0.414                     |
| 1wkcA                       | 0.244              | 0.470                  | 0.536                     | 0.566                     |
| 1xdzA                       | 0.267              | 0.574                  | 0.641                     | 0.513                     |
| 1xffA                       | 0.221              | 0.622                  | 0.442                     | 0.379                     |
| 1xkrA                       | 0.258              | 0.268                  | 0.249                     | 0.270                     |
| 2arcA                       | 0.203              | 0.320                  | 0.264                     | 0.298                     |
| 2cuaA                       | 0.264              | 0.440                  | 0.410                     | 0.442                     |
| 2hs1A                       | 0.224              | 0.218                  | 0.220                     | 0.231                     |
| 2mhrA                       | 0.416              | 0.586                  | 0.643                     | 0.675                     |
| 2phyA                       | 0.337              | 0.411                  | 0.570                     | 0.323                     |
| 2tpsA                       | 0.312              | 0.521                  | 0.540                     | 0.479                     |
| 2vxnA                       | 0.225              | 0.648                  | 0.661                     | 0.570                     |
| 3borA                       | 0.247              | 0.620                  | 0.610                     | 0.561                     |
| 3dggA                       | 0.249              | 0.247                  | 0.359                     | 0.415                     |
| 5ptpA                       | 0.205              | 0.350                  | 0.462                     | 0.516                     |

## Supplementary Figure S1

Mean precision values for protein families with small numbers of effective sequences.  $L$ = length of target protein, at sequence separation ranges  $i-j \geq 5$  (all contacts) and  $i-j \geq 23$  (long range).

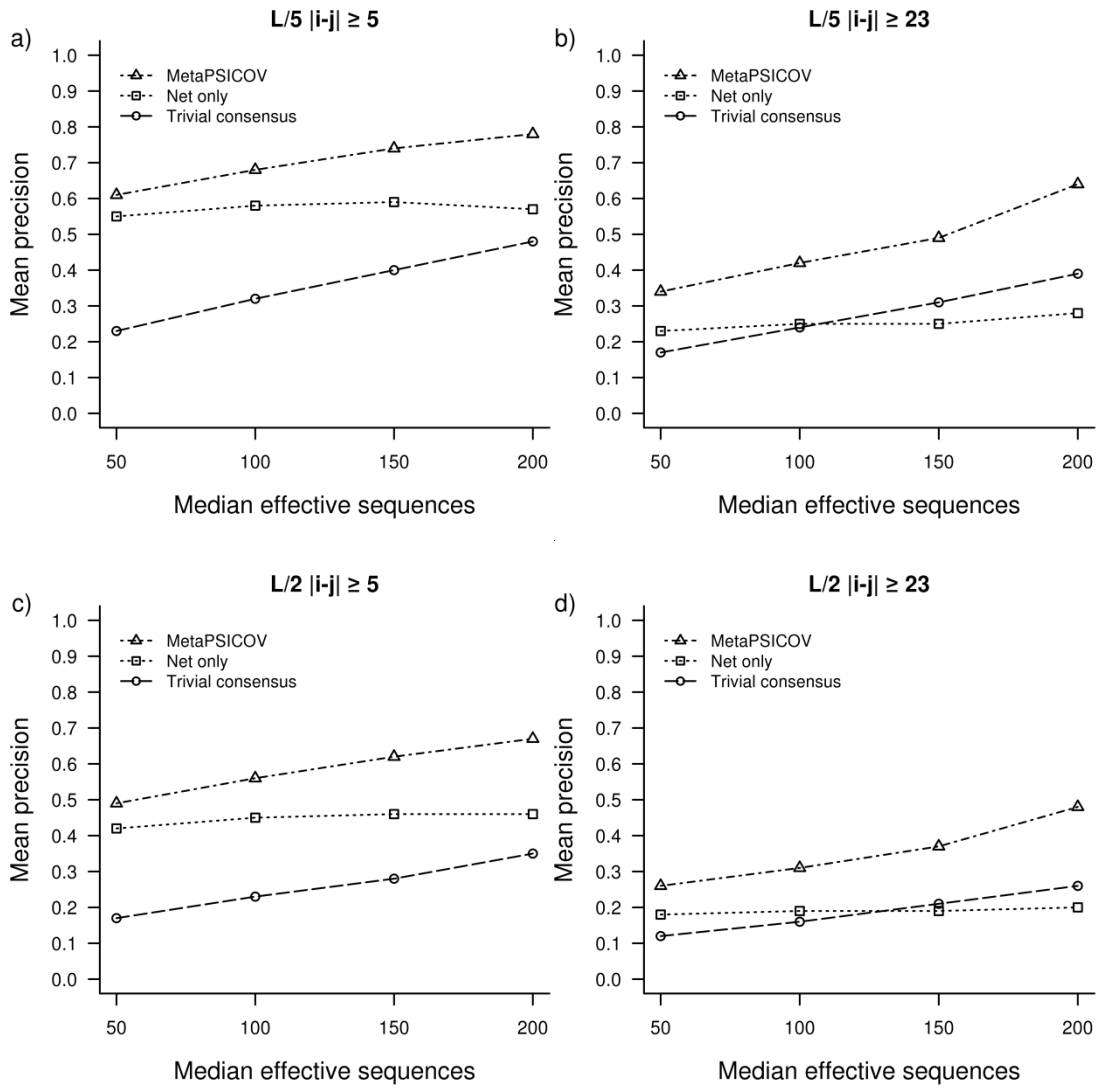

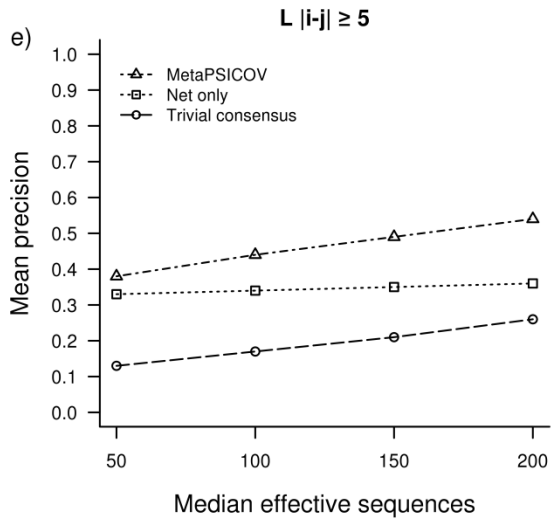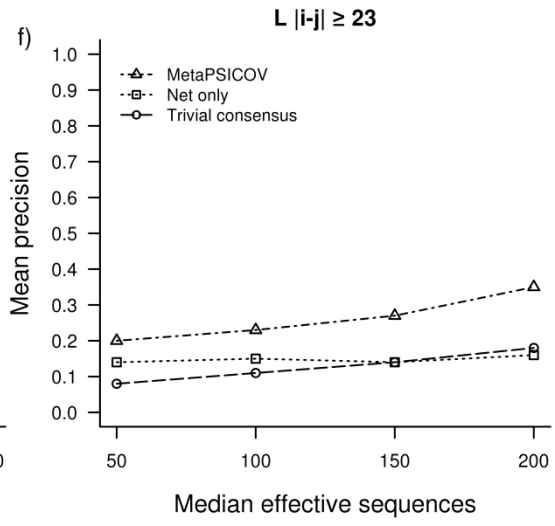

## Supplementary Figure S2

Comparison of model TM-score for FRAGFOLD generated models using contacts from a) MetaPSICOV stage 1 and PSICOV b) MetaPSICOV stage 2 and PSICOV c) MetaPSICOV stage 1 and MetaPSICOV stage 2 (line  $x=y$  shown for reference).

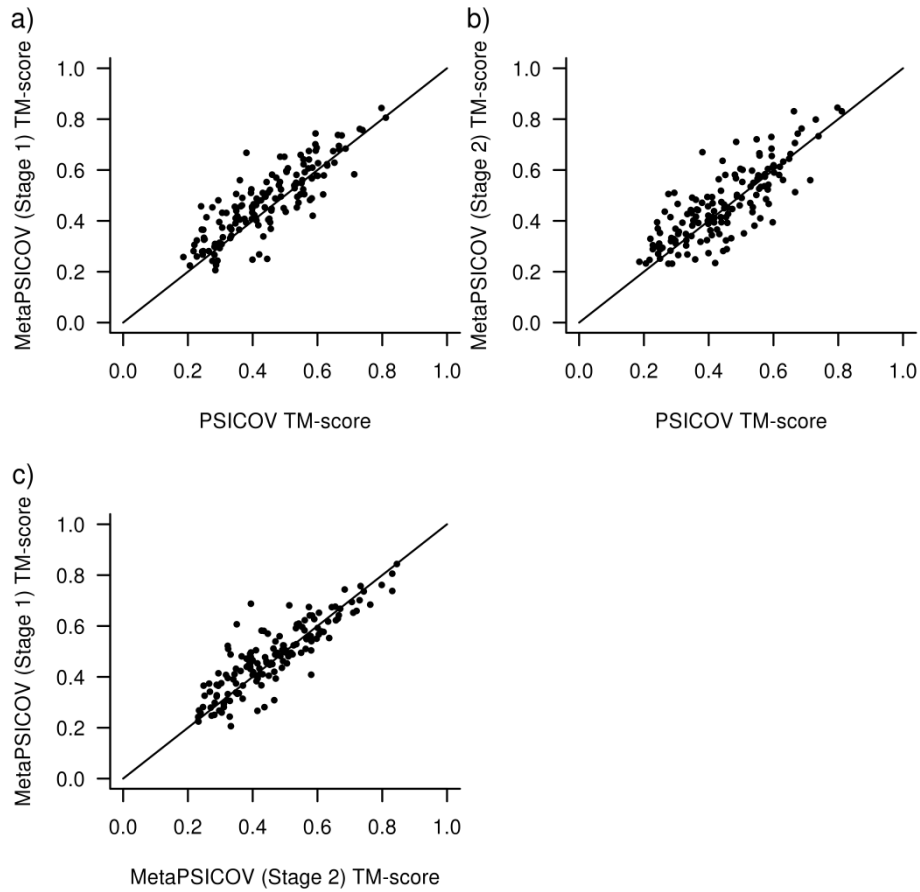

Supplement: supp_btu791_btu791-metapsicov_supplementary_v1_0.pdf [file supp_btu791_btu791-metapsicov_supplementary_v1_0.pdf]
